# Supplementary material for: Oxidative stress in vagal neurons promotes parkinsonian pathology and intercellular α-synuclein transfer
Source: JCI journal article supplement (doi:10.1172/jci127330), 2019-06-13
Supplement: sd1 [file 1]

301 Moved Permanently

# Moved Permanently

The document has moved here.
